# Supplementary material
Source: PubMed Central journal article supplement (PMC3144492)
Supplement: NIHMS310717-supplement-1_si_001.pdf [file NIHMS310717-supplement-1_si_001.pdf]

Supporting Information for “The Crystal Structure of *Streptococcus pyogenes* Uridine Phosphorylase Reveals a Distinct Subfamily of Nucleoside Phosphorylases” by Timothy H. Tran, S. Christoffersen, William B. Parker, Jure Piskur, I. Serra, M. Terreni, Steven E. Ealick

Table S1. Primer sequences for site-directed mutagenesis.

| <b>Mutant</b> | <b>Primer Sequences<sup>a</sup></b> |                                              |
|---------------|-------------------------------------|----------------------------------------------|
| K162A         | K162A-F                             | cgcaggagtagttcaatgtGCGgatgcattttacgggcaacatg |
|               | K162A-R                             | catgttgcccgtaaaatgcatcCGCacattgaactactcctgcg |
|               | K162A-sF                            | caggagtagttcaatgtGCG                         |
| H169A         | H169A-F                             | gatgcattttacgggcaaGCGgagccagaacgtatgccag     |
|               | H169A-R                             | ctggcatacgttctggctcCGCttgcccgtaaaatgcatc     |
|               | H169A-sF                            | atgcattttacgggcaaGCG                         |
| H169D         | H169D-F                             | gcattttacgggcaaGACgagccagaacgtatgccag        |
|               | H169D-R                             | ctggcatacgttctggctcGTtggcccgtaaaatgcatc      |
|               | H169D-sF                            | atgcattttacgggcaaGAC                         |
| H169N         | H169N-F                             | gatgcattttacgggcaaAACgagccagaacgtatgccag     |
|               | H169N-R                             | ctggcatacgttctggctcGTTtggcccgtaaaatgcatc     |
|               | H169N-sF                            | atgcattttacgggcaaAAC                         |
| V220D         | V220D-F                             | ggatcagatttccttgtGgACggtaatcaagaacgcaacg     |
|               | V220D-R                             | cgttgcgttcttgattaccGTcCacaaggaaatctgatcc     |
|               | V220D-sR                            | tgcggttcttgattaccGTcC                        |
| V220E         | V220E-F                             | ggatcagatttccttgtGgAaggtaatcaagaacgcaacg     |
|               | V220E-R                             | cgttgcgttcttgattacctTcCacaaggaaatctgatcc     |

|  |                                |
|--|--------------------------------|
|  | V220E-sR tgcggtccttgattacctTcC |
|--|--------------------------------|

<sup>a</sup> All primers are written in the 5' to 3' direction. The primers designated "F" are the coding direction, their reverse complements are designated "R". Upper case letters indicate deviation from the wild-type sequence. For screening, the primers designated "sF" were paired with the T7T primer (5'-GCTAGTTATTGCTCAGCGG-3') and the primers designated "sR" were screened with the T7Plac primer (5'-TATAGGGGAATTGTGAGCGG-3').

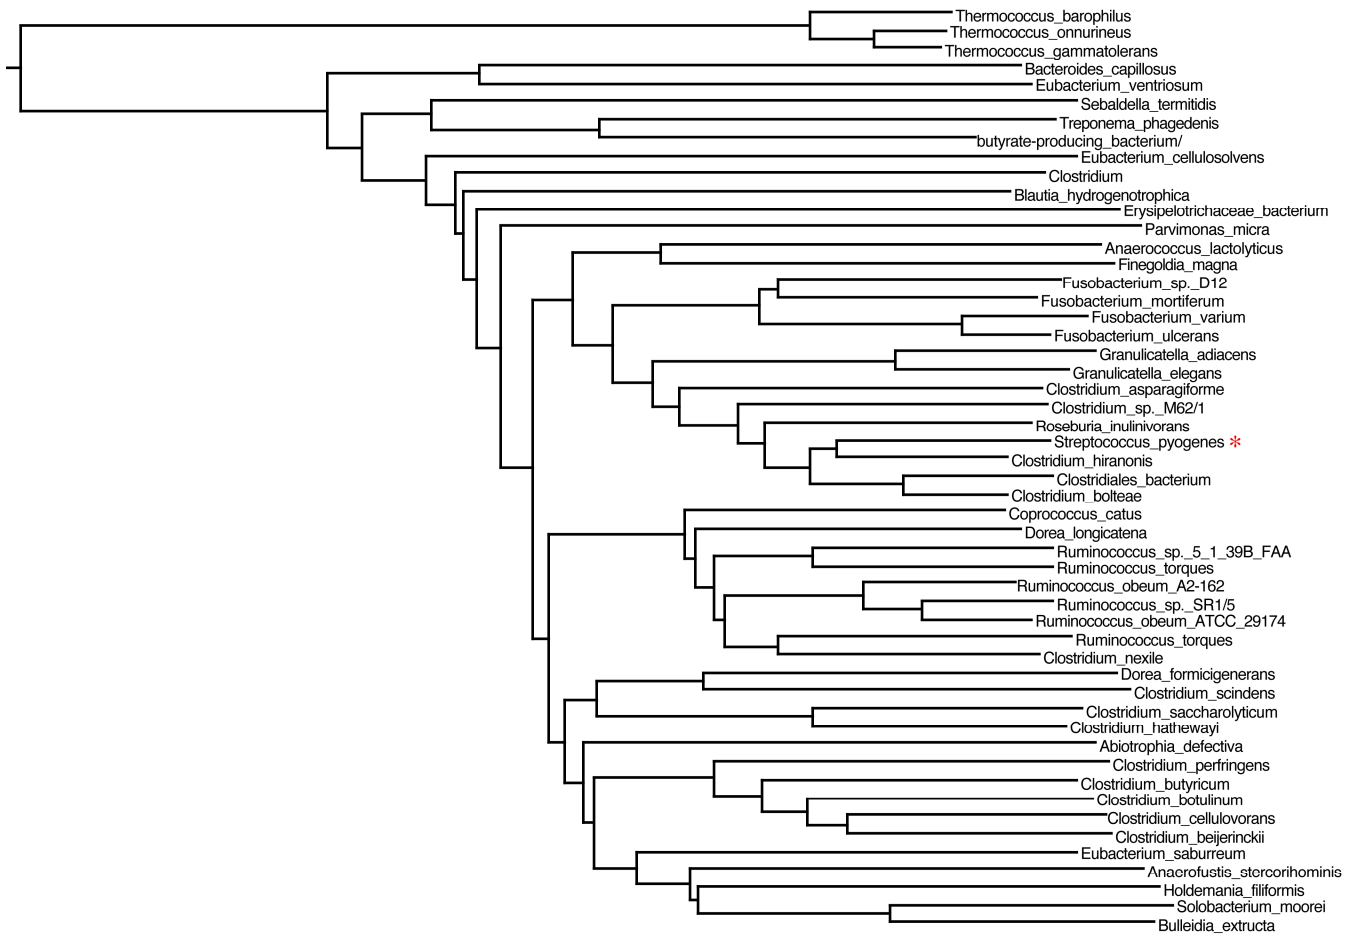

Figure S1. The branch of the phylogenetic tree of uridine phosphorylases depicting the subfamily that contains *Streptococcus pyogenes* UP (SpUp). The tree was generated using ClustalW. A red asterisk highlights the position of SpUP.

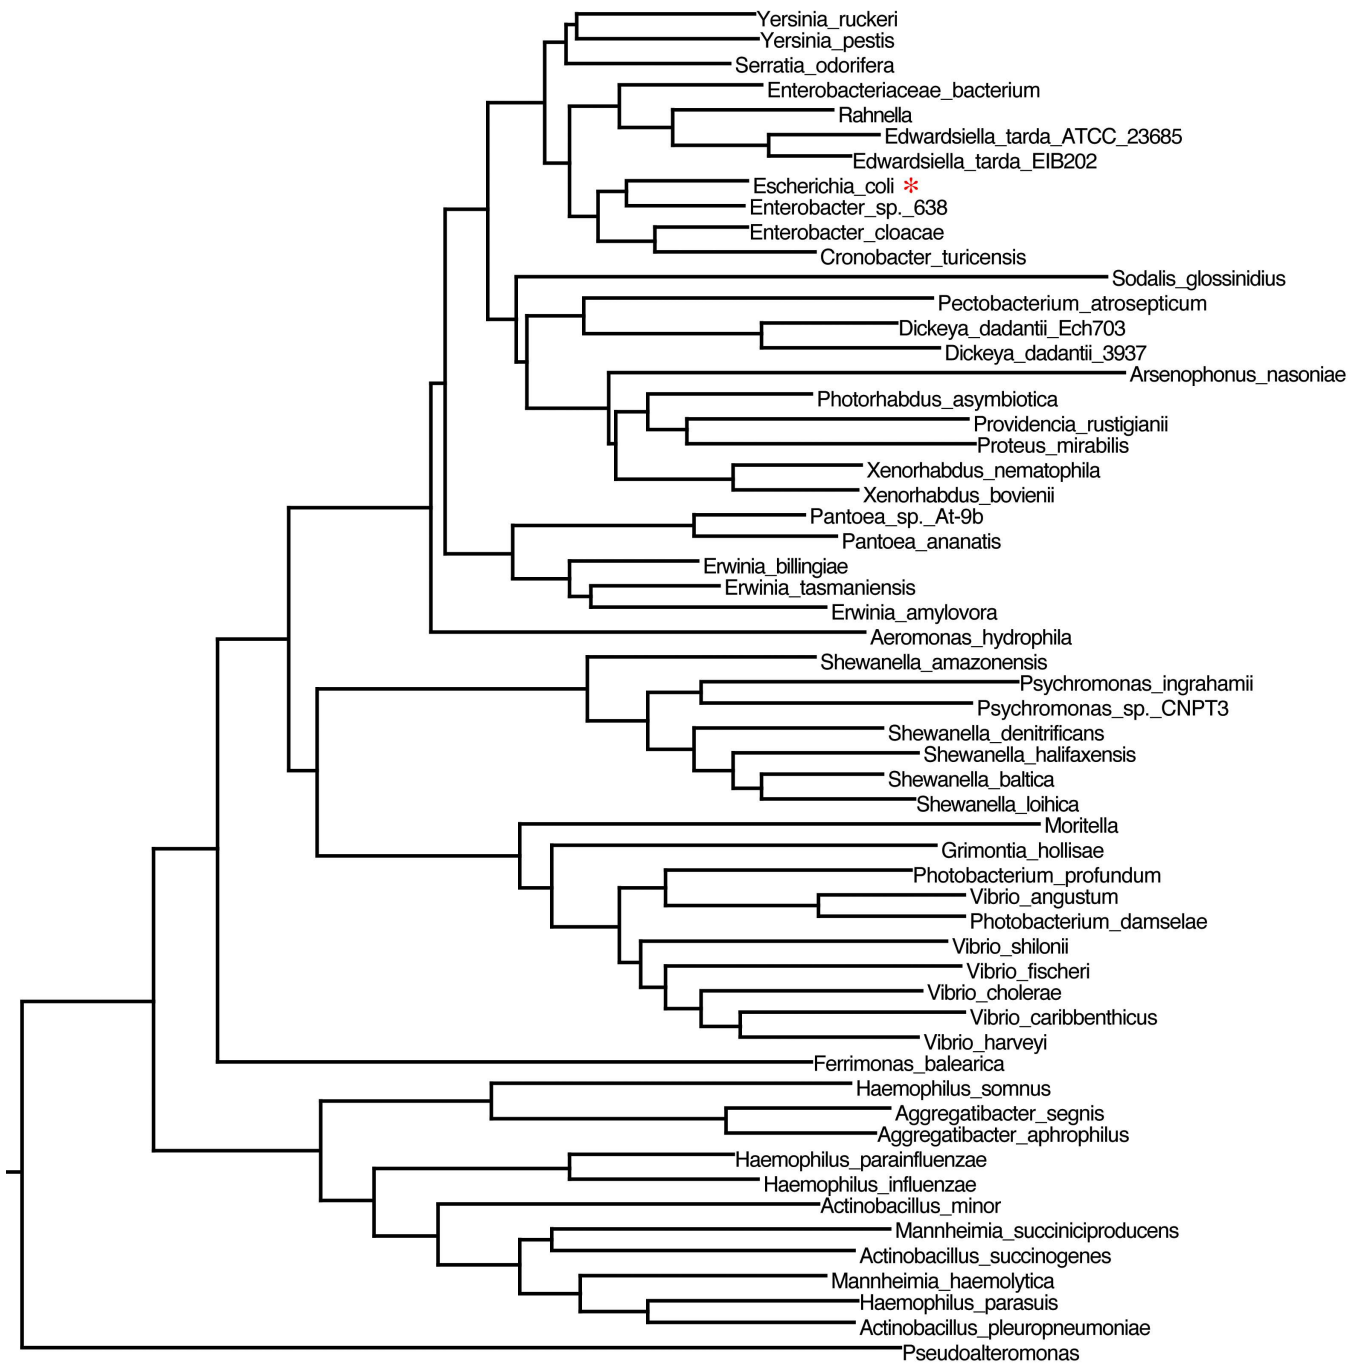

Figure S2. The branch of the phylogenetic tree of uridine phosphorylases depicting the subfamily that contains *Escherichia coli* UP (EcUP). The tree was generated using ClustalW. A red asterisk highlights the position of EcUP.
